# Supplementary material for: GWAS in childhood acute lymphoblastic leukemia reveals novel genetic associations at chromosomes 17q12 and 8q24.21
Source: PubMed Central journal article supplement (PMC5773513; doi:10.1038/s41467-017-02596-9), 2018-01-18
Supplement: 41467_2017_2596_MOESM1_ESM.pdf [file 41467_2017_2596_MOESM1_ESM.pdf]

**Supplementary Table 1: Sample counts for GWAS analysis**

| <u>Discovery</u>   | <u>Latino</u> | <u>Non-Latino white</u> | <u>African American</u> | <u>total</u> |
|--------------------|---------------|-------------------------|-------------------------|--------------|
| Cases CCRLP        | 1949          | 1184                    | 130                     | 3263         |
| Controls<br>CCRLP  | 2120          | 1241                    | 145                     | 15977        |
| Kaiser             | 6464          | 2310                    | 3697                    |              |
| <u>Replication</u> |               |                         |                         |              |
| Cases CCLS         | 530           | 0                       | 0                       | 530          |
| COG                | 0             | 959                     | 0                       | 959          |
| Controls CCLS      | 511           | 0                       | 0                       | 511          |
| WTCCC              | 0             | 2624                    | 0                       | 2624         |

CCRLP: California Childhood Cancer Records Linkage Project

Kaiser: Kaiser Genetic Epidemiology Research on Aging

CCLS: California Childhood Leukemia Study

COG: Children's Oncology Group

WTCCC: Wellcome Trust Case Control Consortium

**Supplementary Table 2: Case-control comparisons at the known "top hit" childhood ALL loci from prior publications**

<sup>a</sup> Risk allele frequency (RAF) from 1000 Genomes (Amerindian RAF is shown for Latinos)

<sup>b</sup> Sample sizes for all analyses: CCRLP Latinos: 1949 cases, 8584 controls; CCRLP whites: 1184 cases, 3551 controls; CCRLP African Americans: 130 cases, 3842 controls.

| chromosome              |                                      | IKZF1- rs11978267 risk allele A/G |                       |                  |
|-------------------------|--------------------------------------|-----------------------------------|-----------------------|------------------|
|                         |                                      | RAF <sup>a</sup>                  | P-value               | OR (95% CI)      |
| 7                       | CCRLP Latinos <sup>b</sup>           | 0.77                              | 9.1x10 <sup>-10</sup> | 1.29 (1.19-1.40) |
|                         | CCRLP Whites <sup>b</sup>            | 0.68                              | 8.9x10 <sup>-23</sup> | 1.66 (1.50-1.84) |
|                         | CCRLP African-Americans <sup>b</sup> | 0.83                              | 5.5x10 <sup>-3</sup>  | 1.49 (1.12-1.98) |
|                         | <b>CCRLP Meta-analysis</b>           |                                   | 2.2x10 <sup>-29</sup> | 1.43             |
| 8                       |                                      | GATA3 - rs3824662 risk allele G/T |                       |                  |
|                         |                                      | RAF <sup>a</sup>                  | P-value               | OR (95% CI)      |
|                         | CCRLP Latinos                        | 0.92                              | 0.84                  | 1.03 (0.76-1.4)  |
|                         | CCRLP Whites                         | 0.81                              | 0.07                  | 1.34 (0.97-1.85) |
| CCRLP African-Americans | 0.64                                 | 0.04                              | 1.84 (1.02-3.32)      |                  |
|                         | <b>CCRLP Meta-analysis</b>           |                                   | 0.045                 | 1.24             |
| 9                       |                                      | CDKN2A- rs2069426 risk allele A/C |                       |                  |
|                         |                                      | RAF <sup>a</sup>                  | P-value               | OR (95% CI)      |
|                         | CCRLP Latinos                        | 0.045                             | 1.1x10 <sup>-3</sup>  | 1.28 (1.10-1.48) |
|                         | CCRLP Whites                         | 0.081                             | 6.5x10 <sup>-7</sup>  | 1.47 (1.26-1.70) |
| CCRLP African-Americans | 0.099                                | 5.5x10 <sup>-3</sup>              | 1.27 (0.83-1.92)      |                  |
|                         | <b>CCRLP Meta-analysis</b>           |                                   | 3.7x10 <sup>-9</sup>  | 1.35             |

10

|                            | <b>PIP4K2A- rs4748813 risk allele C/T</b> |                       |                    |
|----------------------------|-------------------------------------------|-----------------------|--------------------|
|                            | <b>RAF<sup>a</sup></b>                    | <b>P-value</b>        | <b>OR (95% CI)</b> |
| CCRLP Latinos              | 0.76                                      | $9.8 \times 10^{-11}$ | 0.74 (0.68-0.81)   |
| CCRLP Whites               | 0.61                                      | $4.1 \times 10^{-9}$  | 0.75 (0.68-0.82)   |
| CCRLP African-Americans    | 0.35                                      | $2.0 \times 10^{-3}$  | 0.67 (0.51-0.86)   |
| <b>CCRLP Meta-analysis</b> |                                           | $2.5 \times 10^{-20}$ | 0.74               |

10

|                            | <b>ARID5B - rs7089424 risk allele T/G</b> |                        |                    |
|----------------------------|-------------------------------------------|------------------------|--------------------|
|                            | <b>RAF<sup>a</sup></b>                    | <b>P-value</b>         | <b>OR (95% CI)</b> |
| CCRLP Latinos              | 0.48                                      | $3.6 \times 10^{-22}$  | 1.71 (1.58-1.84)   |
| CCRLP Whites               | 0.33                                      | $1.0 \times 10^{-43}$  | 1.60 (1.46-1.77)   |
| CCRLP African-Americans    | 0.24                                      | 0.51                   | 1.10 (0.83-1.47)   |
| <b>CCRLP Meta-analysis</b> |                                           | $2.20 \times 10^{-62}$ | 1.64               |

14

|                            | <b>CEBPE- rs2239633 risk allele C/T</b> |                       |                    |
|----------------------------|-----------------------------------------|-----------------------|--------------------|
|                            | <b>RAF<sup>a</sup></b>                  | <b>P-value</b>        | <b>OR (95% CI)</b> |
| CCRLP Latinos              | 0.55                                    | $5.6 \times 10^{-10}$ | 0.78 (0.72-0.84)   |
| CCRLP Whites               | 0.52                                    | $2.0 \times 10^{-4}$  | 0.80 (0.72-0.90)   |
| CCRLP African-Americans    | 0.82                                    | 0.58                  | 0.92 (0.67-1.25)   |
| <b>CCRLP Meta-analysis</b> |                                         | $7.3 \times 10^{-13}$ | 0.79               |

The following two loci reported in Vijaykrishnan, et al., Leukemia 2017

10

|                            | <b>LHPP- *rs3740540 risk allele C/T</b> |                      |                    |
|----------------------------|-----------------------------------------|----------------------|--------------------|
|                            | <b>RAF<sup>a</sup></b>                  | <b>P-value</b>       | <b>OR (95% CI)</b> |
| CCRLP Latinos              | 0.75                                    | 1.7x10 <sup>-4</sup> | 1.16 (1.07-1.25)   |
| CCRLP Whites               | 0.7                                     | 1.2x10 <sup>-2</sup> | 1.17 (1.04-1.32)   |
| CCRLP African-Americans    | 0.95                                    | 0.54                 | 1.09 (0.83-1.43)   |
| <b>CCRLP Meta-analysis</b> |                                         | 5.7x10 <sup>-6</sup> | 1.16               |

\*imputed genotype

12

|                            | <b>ELK3- *rs2302902 risk allele A/G</b> |                      |                    |
|----------------------------|-----------------------------------------|----------------------|--------------------|
|                            | <b>RAF<sup>a</sup></b>                  | <b>P-value</b>       | <b>OR (95% CI)</b> |
| CCRLP Latinos              | 0.34                                    | 1.7x10 <sup>-3</sup> | 1.13 (1.05-1.22)   |
| CCRLP Whites               | 0.23                                    | 0.22                 | 1.07 (0.96-1.18)   |
| CCRLP African-Americans    | 0.22                                    | 0.69                 | 0.95 (0.73-1.23)   |
| <b>CCRLP Meta-analysis</b> |                                         | 2.1x10 <sup>-3</sup> | 1.1                |

\*imputed genotype

**Supplementary Table 3: Lead SNPs near SP4, 8q24, and IKZF3 reaching genome-wide significance in discovery analyses of CCRLP acute lymphoblastic leukemia patients, including replication analyses in the Children's Oncology Group and the California Childhood Leukemia Study Latino Participants: P values, Odds Ratios, and I<sup>2</sup> values.**

|                                  | SP4 - rs2390536 risk allele A |                   |                | 8q24.1 - rs4617118 risk allele G |                  |                | IKZF3 - rs2290400 risk allele T |                  |                |
|----------------------------------|-------------------------------|-------------------|----------------|----------------------------------|------------------|----------------|---------------------------------|------------------|----------------|
|                                  | P-value                       | OR (95% CI)       | I <sup>2</sup> | P-value                          | OR (95% CI)      | I <sup>2</sup> | P-value                         | OR (95% CI)      | I <sup>2</sup> |
| <b>CCRLP Meta-analysis</b>       | <b>3.59x10<sup>-8</sup></b>   | 1.20 (1.13-1.29)  | 0%             | <b>3.05x10<sup>-9</sup></b>      | 1.27 (1.17-1.38) | 7.2%           | <b>2.05x10<sup>-8</sup></b>     | 1.18 (1.11-1.25) | 0%             |
| CCRLP Hispanics                  | 1.42x10 <sup>-4</sup>         | 1.19 (1.09-1.31)  | -              | 2.90x10 <sup>-5</sup>            | 1.25 (1.12-1.38) | -              | 4.33x10 <sup>-6</sup>           | 1.20 (1.11-1.30) | -              |
| CCRLP Whites                     | 5.69x10 <sup>-5</sup>         | 1.23 (1.11-1.35)  | -              | 1.74x10 <sup>-3</sup>            | 1.26 (1.09-1.45) | -              | 2.72x10 <sup>-3</sup>           | 1.15 (1.05-1.26) | -              |
| CCRLP African-Americans          | 0.73                          | 1.07 (0.73-1.58)  | -              | 1.55x10 <sup>-3</sup>            | 1.54 (1.18-2.01) | -              | 0.18                            | 1.19 (0.92-1.53) | -              |
| <b>Replication meta-analysis</b> | 0.075                         | 1.10 (0.99-1.23)  | 48.3%          | <b>1.29x10<sup>-4</sup></b>      | 1.30 (1.14-1.49) | 60.8%          | <b>0.013</b>                    | 1.14 (1.03-1.26) | 0%             |
| COG Replication (European)       | 0.025                         | 1.15 (1.018-1.31) | -              | 0.011                            | 1.22 (1.05-1.43) | -              | 0.13                            | 1.10 (0.97-1.25) | -              |
| CCLS Replication (Hispanic)      | 0.74                          | 0.96 (0.77-1.20)  | -              | 1.03x10 <sup>-3</sup>            | 1.58 (1.20-2.07) | -              | 0.030                           | 1.22 (1.02-1.46) | -              |
| <b>Combined Datasets</b>         | <b>1.77x10<sup>-8</sup></b>   | 1.18 (1.11-1.24)  | 5.8%           | <b>1.76x10<sup>-12</sup></b>     | 1.28 (1.19-1.37) | 16.4%          | <b>1.06x10<sup>-9</sup></b>     | 1.17 (1.11-1.23) | 0%             |

See Table 1 of main text for information regarding whether SNPs are genotyped “on array” or imputed for each sample set.

| Supplementary Table 4: Top hit SNPs (1 X 10 <sup>7</sup> or lower) proximal to the top hit SNP rs4617118 in chromosome 8 with functional annotations. |                  |          |          |                 |                 |                 |                   |             |             |             |             |       |              |             |        |        |                                                                                      |
|-------------------------------------------------------------------------------------------------------------------------------------------------------|------------------|----------|----------|-----------------|-----------------|-----------------|-------------------|-------------|-------------|-------------|-------------|-------|--------------|-------------|--------|--------|--------------------------------------------------------------------------------------|
| rsID                                                                                                                                                  | pos              | allele A | allele B | P value         | coded af        | beta            | OR                | AFR         | AMR         | ASN         | EUR         | DNase | Regulome DB* | gwas        | Motifs | RefSeq | Location                                                                             |
| rs72730213                                                                                                                                            | 130154246        | G        | A        | 4.43E-09        | 0.136035        | 0.252892        | 1.28774419        | 0.01        | 0.09        | 0.04        | 0.13        |       | 7            |             |        |        |                                                                                      |
| rs72730214                                                                                                                                            | 130155389        | T        | C        | 1.54E-08        | 0.151237        | 0.234029        | 1.26368114        | 0.03        | 0.11        | 0.09        | 0.15        |       | 7            |             |        |        |                                                                                      |
| rs11777951                                                                                                                                            | 130155422        | A        | G        | 4.34E-09        | 0.136086        | 0.252682        | 1.28747738        | 0.01        | 0.09        | 0.04        | 0.13        |       | 7            |             |        |        |                                                                                      |
| rs72730215                                                                                                                                            | 130155860        | C        | T        | 4.30E-09        | 0.136107        | 0.25262         | 1.28739997        | 0.01        | 0.09        | 0.04        | 0.13        |       | 5            | Hgf         |        |        |                                                                                      |
| <b>rs4617118</b>                                                                                                                                      | <b>130156143</b> | <b>A</b> | <b>G</b> | <b>3.05E-09</b> | <b>0.185412</b> | <b>0.229802</b> | <b>1.25835083</b> | <b>0.28</b> | <b>0.13</b> | <b>0.09</b> | <b>0.15</b> |       | <b>6</b>     | <b>Mef2</b> |        |        |                                                                                      |
| rs72730217                                                                                                                                            | 130156776        | A        | C        | 1.44E-08        | 0.158423        | 0.231295        | 1.26023095        | 0.12        | 0.11        | 0.09        | 0.15        |       | 7            |             |        |        |                                                                                      |
| rs4418312                                                                                                                                             | 130157804        | C        | G        | 1.75E-09        | 0.153064        | 0.246928        | 1.28008694        | 0.06        | 0.1         | 0.09        | 0.15        |       | 7            |             |        |        |                                                                                      |
| rs72730218                                                                                                                                            | 130162156        | A        | G        | 1.25E-09        | 0.150696        | 0.251841        | 1.28639149        | 0.06        | 0.11        | 0.07        | 0.15        |       | 7            |             |        |        |                                                                                      |
| rs149184189                                                                                                                                           | 130169385        | C        | G        | 2.19E-08        | 0.13945         | 0.244254        | 1.27666856        | 0.01        | 0.1         | 0.06        | 0.14        |       | 7            |             |        |        |                                                                                      |
| rs11784062                                                                                                                                            | 130169962        | T        | G        | 3.39E-08        | 0.131708        | 0.248368        | 1.2819316         | 0.02        | 0.1         | 0.04        | 0.13        |       | 6            |             |        |        |                                                                                      |
| rs77269791                                                                                                                                            | 130176904        | G        | A        | 1.61E-09        | 0.0947452       | 0.311346        | 1.36526152        | 0.01        | 0.06        | 0.0035      | 0.11 Yes    |       | 4            |             |        |        | SP4, WT1, Zfp281, Sp1, MAZ, CKROX, MAZR, A549, Sp3, UF1H3BETA, KLF16, Plag1          |
| rs11994022                                                                                                                                            | 130178201        | C        | T        | 8.79E-08        | 0.147707        | 0.228485        | 1.25669468        | 0.02        | 0.1         | 0.06        | 0.14 Yes    |       | 5            |             |        |        | T47d, Rwpe1, Htr8, Ut189, POLR2A                                                     |
| rs79207438                                                                                                                                            | 130182671        | C        | T        | 2.29E-08        | 0.115747        | 0.257541        | 1.29374485        | 0.05        | 0.08        | 0.02        | 0.11 Yes    |       | 3a           |             |        |        | Hoxb9, Hoxa9, MEF2A, Hoxc12, MEF-2, Cdx-2, hoxa9, Fibrop                             |
| rs74756667                                                                                                                                            | 130182794        | G        | A        | 3.65E-08        | 0.118482        | 0.2517          | 1.28621012        | 0.05        | 0.09        | 0.02        | 0.11        |       | 5            |             |        |        | Bbx, Lhcnm2, Diff4d, Lhcnm2, Htr8, SETDB1                                            |
| rs75777619                                                                                                                                            | 130185176        | A        | G        | 2.26E-08        | 0.115729        | 0.257615        | 1.29384059        | 0.05        | 0.08        | 0.02        | 0.11 Yes    |       | 5            |             |        |        | Hbvp, Htr8                                                                           |
| rs28665337                                                                                                                                            | 130194104        | C        | A        | 1.74E-08        | 0.116628        | 0.257823        | 1.29410974        | 0.05        | 0.09        | 0.02        | 0.11        |       | 7            |             |        |        | PPARalpha:RXRalpha                                                                   |
| rs28484683                                                                                                                                            | 130194436        | G        | A        | 2.71E-08        | 0.119517        | 0.252192        | 1.28684309        | 0.07        | 0.1         | 0.02        | 0.11        |       | 7            |             |        |        |                                                                                      |
| rs76999656                                                                                                                                            | 130194640        | G        | C        | 2.64E-08        | 0.119396        | 0.252637        | 1.28741586        | 0.07        | 0.1         | 0.02        | 0.11        |       | 6            |             |        |        | HNf4:Nf-kappaB                                                                       |
| rs76714314                                                                                                                                            | 130195170        | G        | A        | 4.80E-08        | 0.0954829       | 0.276596        | 1.31863354        | 0.01        | 0.06        | 0           | 0.1         |       | 7            |             |        |        |                                                                                      |
| rs77387362                                                                                                                                            | 130195769        | T        | C        | 2.73E-08        | 0.11952         | 0.252104        | 1.28672985        | 0.07        | 0.1         | 0.02        | 0.11        |       | 6            |             |        |        | Evi-1;Foxa;Foxa;Foxa;Foxj2;Foxl1;Foxp1;HDAC2;Mef2;Sox_3                              |
| rs75614243                                                                                                                                            | 130197102        | A        | G        | 2.75E-08        | 0.119523        | 0.252023        | 1.28662563        | 0.07        | 0.1         | 0.02        | 0.11        |       | 6            |             |        |        | Bbx:Nf-Y:RXRA                                                                        |
| rs11997664                                                                                                                                            | 130197527        | C        | T        | 2.76E-08        | 0.119523        | 0.25199         | 1.28658317        | 0.07        | 0.1         | 0.02        | 0.11        |       | 6            |             |        |        | THAP1,Y1                                                                             |
| rs6995223                                                                                                                                             | 130200252        | G        | C        | 2.82E-08        | 0.119528        | 0.251749        | 1.28627314        | 0.07        | 0.1         | 0.02        | 0.11        |       | 7            |             |        |        |                                                                                      |
| rs7830899                                                                                                                                             | 130201569        | C        | T        | 3.09E-08        | 0.119586        | 0.250998        | 1.28530751        | 0.07        | 0.1         | 0.02        | 0.11        |       | 5            |             |        |        | Foxp1;Hbp1;Irf;Nrf-2;Pax-6;Zfp105;p300                                               |
| rs6470703                                                                                                                                             | 130201966        | T        | C        | 2.41E-09        | 0.123666        | 0.268962        | 1.30860541        | 0.11        | 0.1         | 0.02        | 0.11        |       | 7            |             |        |        |                                                                                      |
| rs3935421                                                                                                                                             | 130203139        | A        | G        | 2.44E-09        | 0.123667        | 0.268836        | 1.30844054        | 0.11        | 0.1         | 0.02        | 0.11        |       | 6            |             |        |        | ATF3;ATF3;ATF3;ATF6;Hdx;XBP-1                                                        |
| rs73388076                                                                                                                                            | 130204575        | C        | G        | 2.50E-09        | 0.123669        | 0.268597        | 1.30812786        | 0.11        | 0.1         | 0.02        | 0.11 Yes    |       | 5            |             |        |        | Nkx2;Rhox11                                                                          |
| rs73388080                                                                                                                                            | 130204909        | C        | T        | 4.23E-09        | 0.124452        | 0.264184        | 1.30236781        | 0.11        | 0.1         | 0.02        | 0.11        |       | 7            |             |        |        |                                                                                      |
| rs7460736                                                                                                                                             | 130205817        | A        | T        | 2.62E-09        | 0.123672        | 0.268057        | 1.30742166        | 0.11        | 0.1         | 0.02        | 0.11        |       | 5            |             |        |        | Dbx1;Fox;Foxa;Focx1;Foxf1;Foxl1;Foxj1;Foxk1;Foxl1;Foxo3;Foxp1;HDAC2;Hoxd8;Ncx;Zfp105 |
| rs4557668                                                                                                                                             | 130206261        | G        | C        | 3.58E-08        | 0.11967         | 0.249486        | 1.2833656         | 0.07        | 0.1         | 0.02        | 0.11        |       | 7            |             |        |        |                                                                                      |
| rs78165253                                                                                                                                            | 130207410        | A        | G        | 5.58E-08        | 0.119482        | 0.245779        | 1.27861697        | 0.07        | 0.1         | 0.02        | 0.11        |       | 7            |             |        |        |                                                                                      |
| rs80029873                                                                                                                                            | 130207750        | G        | A        | 5.61E-08        | 0.119483        | 0.245722        | 1.27854409        | 0.07        | 0.1         | 0.02        | 0.11 Yes    |       | 5            |             |        |        | ATF3;Nrf-2;SREBP;ZEB1;Zbtb3                                                          |
| rs78110386                                                                                                                                            | 130209209        | C        | A        | 4.01E-08        | 0.118945        | 0.248735        | 1.28240215        | 0.07        | 0.1         | 0.02        | 0.11 Yes    |       | 5            |             |        |        | CTCF;HNF4                                                                            |
| rs11994734                                                                                                                                            | 130209964        | T        | C        | 3.66E-08        | 0.116626        | 0.251139        | 1.28548876        | 0.04        | 0.09        | 0.02        | 0.11        |       | 7            |             |        |        |                                                                                      |
| rs55806657                                                                                                                                            | 130210430        | T        | C        | 4.71E-09        | 0.123597        | 0.263355        | 1.30128859        | 0.11        | 0.1         | 0.02        | 0.11        |       | 5            |             |        |        | BATF;Bach1;TCF11;MafG;Zbtb3                                                          |
| rs4571701                                                                                                                                             | 130210946        | G        | C        | 5.87E-08        | 0.119488        | 0.245214        | 1.27789475        | 0.07        | 0.1         | 0.02        | 0.11        |       | 7            |             |        |        |                                                                                      |
| rs4422741                                                                                                                                             | 130211328        | T        | C        | 5.91E-08        | 0.119488        | 0.245139        | 1.2779892         | 0.07        | 0.1         | 0.02        | 0.11        |       | 3a           |             |        |        | CEBPg;p300                                                                           |
| rs75114317                                                                                                                                            | 130214963        | C        | A        | 3.95E-08        | 0.116632        | 0.25031         | 1.28442353        | 0.04        | 0.09        | 0.02        | 0.11 Yes    |       | 4            |             |        |        | CDP;Cphx;Pbx-1                                                                       |
| rs56397715                                                                                                                                            | 130217355        | A        | G        | 4.07E-08        | 0.116635        | 0.249934        | 1.28394067        | 0.04        | 0.09        | 0.02        | 0.11 Yes    |       | 6            |             |        |        | Cdp;Cphx;HNF1;HNF1;Hoxb4;Pou6f1                                                      |
| rs75281442                                                                                                                                            | 130218345        | T        | C        | 4.14E-08        | 0.116636        | 0.249764        | 1.28372242        | 0.04        | 0.09        | 0.02        | 0.11 Yes    |       | 3a           |             |        |        | Cphx                                                                                 |
| rs11997752                                                                                                                                            | 130218781        | T        | C        | 4.17E-08        | 0.116637        | 0.249677        | 1.28361074        | 0.04        | 0.09        | 0.02        | 0.11 Yes    |       | 6            |             |        |        | Cdx;Evi-1;Foxj1;Foxj2;Foxk1;Foxp1;HLF                                                |
| rs11994768                                                                                                                                            | 130219021        | G        | A        | 6.57E-08        | 0.119501        | 0.243903        | 1.27622053        | 0.07        | 0.1         | 0.02        | 0.11        |       | 7            |             |        |        |                                                                                      |
| rs5003704                                                                                                                                             | 130222435        | G        | A        | 4.26E-08        | 0.116622        | 0.249584        | 1.28349137        | 0.04        | 0.09        | 0.02        | 0.11 Yes    |       | 7            |             |        |        |                                                                                      |
| rs4484652                                                                                                                                             | 130223575        | G        | T        | 5.45E-08        | 0.119086        | 0.247633        | 1.28098972        | 0.07        | 0.1         | 0.02        | 0.11        |       | 7            |             |        |        |                                                                                      |
| rs59047450                                                                                                                                            | 130224231        | A        | G        | 1.89E-08        | 0.135731        | 0.245163        | 1.27782958        | 0.12        | 0.1         | 0.05        | 0.13        |       | 5            |             |        |        | Irf;PU.1;Rad21                                                                       |
| rs59282112                                                                                                                                            | 130225521        | T        | A        | 5.06E-08        | 0.136049        | 0.238553        | 1.26941098        | 0.08        | 0.1         | 0.05        | 0.14        |       | 7            |             |        |        |                                                                                      |
| rs7832380                                                                                                                                             | 130226561        | G        | A        | 8.19E-08        | 0.128426        | 0.248125        | 1.28162013        | 0.08        | 0.09        | 0.05        | 0.12        |       | 7            |             |        |        |                                                                                      |

SNPs with a larger effect size than the index SNP with the lowest P-value rs4617118 (bolded) appear here. Position (hg19) followed by the major allele A, minor allele B, P-value in meta-analysis, coded allele frequency in entire dataset, beta value, meta-analysis OR (odds ratio), 1000 genomes minor allele frequency in Africans, Amerindians, Asians, and Europeans, evidence of DNA hypersensitive site (from Haploreg), Regulome DB score, GWAS hits from other diseases, ENCODE-described motifs which interact at the site, RefSeq gene annotation at that location, and the location within the gene.

\*Regulome DB Score

- 1a eQTL + TF binding + matched TF motif + matched DNase Footprint + DNase peak
- 1b eQTL + TF binding + any motif + DNase Footprint + DNase peak
- 1c eQTL + TF binding + matched TF motif + DNase peak
- 1d eQTL + TF binding + any motif + DNase peak
- 1e eQTL + TF binding + matched TF motif
- 1f eQTL + TF binding / DNase peak
- 2a TF binding + matched TF motif + matched DNase Footprint + DNase peak
- 2b TF binding + any motif + DNase Footprint + DNase peak
- 2c TF binding + matched TF motif + DNase peak
- 3a TF binding + any motif + DNase peak
- 3b TF binding + matched TF motif
- 4 TF binding + DNase peak
- 5 TF binding or DNase peak
- 6 other (minimal binding data)
- 7 no data

Supplementary Table 5: Top hit SNPs ( $1 \times 10^{-7}$  or lower) proximal to the top hit SNP rs2290400 in chromosome 17, with functional annotations.

| rsID             | pos             | allele A | allele B | P value         | coded af       | beta             | OR                | chr       | AFR         | AMR         | ASN         | EUR         | DNase | regulome DB | gwas                            | Motifs Altered                                                    | RefSeq       | Location   |
|------------------|-----------------|----------|----------|-----------------|----------------|------------------|-------------------|-----------|-------------|-------------|-------------|-------------|-------|-------------|---------------------------------|-------------------------------------------------------------------|--------------|------------|
| rs2941519        | 37903731        | G        | A        | 7.35E-07        | 0.547115       | 0.145409         | 1.15651249        | 17        | 0.33        | 0.57        | 0.62        | 0.49        |       | 7           |                                 |                                                                   | GRB7         |            |
| rs9747973        | 37905107        | C        | T        | 5.08E-07        | 0.53923        | 0.14552          | 1.15664087        | 17        | 0.41        | 0.56        | 0.63        | 0.47        | Yes   | 5           |                                 | TBX21, T47d                                                       | GRB7         |            |
| rs2941522        | 37910368        | C        | T        | 6.67E-07        | 0.545668       | 0.143793         | 1.15464507        | 17        | 0.44        | 0.58        | 0.65        | 0.47        | Yes   | 4           |                                 | NRSF                                                              | GRB7         |            |
| rs907091         | 37921742        | C        | T        | 4.92E-08        | 0.533186       | 0.160323         | 1.17388998        | 17        | 0.31        | 0.56        | 0.65        | 0.48        | Yes   | 1f          |                                 | MED24, SPI1, GATA2                                                | IKZF3        | U3         |
| rs2952140        | 37928059        | C        | T        | 9.56E-08        | 0.530094       | 0.156238         | 1.16910442        | 17        | 0.32        | 0.56        | 0.64        | 0.47        |       | 5           |                                 | ATF3;GATA;Pax-5;SREBP                                             | IKZF3        | INT        |
| rs2313430        | 37929816        | T        | C        | 2.49E-07        | 0.535753       | 0.150379         | 1.16227466        | 17        | 0.38        | 0.56        | 0.65        | 0.47        | Yes   | 1d          |                                 | Pou2f2                                                            | IKZF3        | INT        |
| rs2952144        | 37960017        | C        | T        | 6.30E-07        | 0.533532       | 0.145907         | 1.15708857        | 17        | 0.38        | 0.55        | 0.65        | 0.47        |       | 6           |                                 | Myc;NRSF;PLAG1;Sp4                                                | IKZF3        | INT        |
| rs9303277        | 37976469        | C        | T        | 1.39E-07        | 0.463669       | -0.154423        | 0.85690947        | 17        | 0.62        | 0.44        | 0.35        | 0.53        | Yes   | 1f          | Biliary cirrhosis, Lupus        | Arid3a;Cdc5;Pou2f2;Pou3f1                                         | IKZF3        | INT        |
| rs12944882       | 37983492        | T        | C        | 1.38E-07        | 0.482766       | -0.153458        | 0.85773679        | 17        | 0.64        | 0.46        | 0.32        | 0.56        |       | 7           |                                 |                                                                   | IKZF3        | INT        |
| rs3816470        | 37985801        | A        | G        | 1.58E-07        | 0.480899       | -0.153492        | 0.85770763        | 17        | 0.64        | 0.45        | 0.32        | 0.56        |       | 6           |                                 | Dbx1;Fox;Foxl1;Foxo3;HNF1;Pou2f2;TATA;TEF                         | IKZF3        | INT        |
| rs9916765        | 38005595        | T        | C        | 2.40E-07        | 0.451725       | -0.152755        | 0.85839999        | 17        | 0.62        | 0.44        | 0.31        | 0.52        |       | 6           |                                 | AP-1;IRC900814;Pax-4;Pax-4                                        | IKZF3        | INT        |
| rs35222145       | 38007321        | T        | G        | 1.88E-07        | 0.35437        | -0.182204        | 0.8334313         | 17        | 0.32        | 0.35        | 0.25        | 0.44        |       | 6           |                                 | Mef2;Pax1;Pou2f2;TATA                                             | IKZF3        | INT        |
| rs1453559        | 38020419        | T        | C        | 8.93E-07        | 0.461295       | -0.14168         | 0.86789894        | 17        | 0.63        | 0.44        | 0.31        | 0.53        | Yes   | 4           |                                 | SRF;Htr8;Hcf                                                      | IKZF3        | US         |
| rs11655198       | 38026169        | C        | T        | 4.48E-07        | 0.416013       | -0.148681        | 0.861844          | 17        | 0.26        | 0.39        | 0.31        | 0.52        |       | 6           |                                 | Gmeb1                                                             | ZBP2         | INT        |
| rs11650661       | 38026286        | A        | T        | 6.46E-07        | 0.418145       | -0.145891        | 0.8642519         | 17        | 0.26        | 0.39        | 0.31        | 0.52        |       | 7           |                                 |                                                                   | ZBP2         | INT        |
| rs11655292       | 38026361        | C        | G        | 6.65E-07        | 0.416905       | -0.146054        | 0.86411104        | 17        | 0.26        | 0.39        | 0.31        | 0.52        |       | 7           |                                 |                                                                   | ZBP2         | INT        |
| rs12936231       | 38029120        | C        | G        | 3.08E-07        | 0.455691       | -0.149981        | 0.86072433        | 17        | 0.56        | 0.43        | 0.31        | 0.53        | Yes   | 1f          |                                 | Foxm1;Lmo2;ZEB1;Zbtb3                                             | ZBP2         | INT        |
| rs9903250        | 38031030        | G        | A        | 5.19E-07        | 0.418388       | -0.14758         | 0.86279341        | 17        | 0.27        | 0.4         | 0.31        | 0.52        |       | 7           |                                 |                                                                   | ZBP2         | INT        |
| rs200216135      | 38032132        | G        | GC       | 8.56E-08        | 0.423408       | -0.159103        | 0.8529085         | 17        | 0.26        | 0.4         | 0.31        | 0.52        |       | 6           |                                 | HDAC2;Irf;Pax-4;SP1;Zfp105;p300                                   | ZBP2         | INT        |
| rs9901146        | 38043343        | G        | A        | 9.77E-07        | 0.428794       | -0.144359        | 0.86557695        | 17        | 0.37        | 0.4         | 0.31        | 0.52        | Yes   | 6           |                                 | CDP_2; ELF3                                                       | ZBP2         | .          |
| rs36084703       | 38063980        | CA       | C        | 7.25E-07        | 0.384373       | -0.149486        | 0.86084054        | 17        | 0.13        | 0.37        | 0.3         | 0.49        |       | 6           |                                 | Bbx;Dlx2;Evi-1;HMG-IY;Hoxd10;Lhx3;Lhx3;Mef2;Ncx2;Nkx6;Pax4;Sox_18 | GSDMB        | INT        |
| <b>rs2290400</b> | <b>38066240</b> | <b>T</b> | <b>C</b> | <b>1.29E-08</b> | <b>0.44566</b> | <b>-0.166431</b> | <b>0.84668124</b> | <b>17</b> | <b>0.49</b> | <b>0.42</b> | <b>0.33</b> | <b>0.52</b> |       | <b>6</b>    | <b>Diabetes, type 1; asthma</b> | <b>PRDM1</b>                                                      | <b>GSDMB</b> | <b>INT</b> |
| rs56380902       | 38066372        | T        | C        | 4.38E-07        | 0.440646       | -0.145633        | 0.86447491        | 17        | 0.47        | 0.42        | 0.32        | 0.52        | Yes   | 7           |                                 |                                                                   | GSDMB        | INT        |
| rs7219923        | 38074518        | C        | T        | 1.33E-07        | 0.551585       | 0.154014         | 1.16650722        | 17        | 0.53        | 0.58        | 0.68        | 0.47        | Yes   | 1f          |                                 | MED24; Ifna4h; POLR2A                                             | GSDMB        | INT        |

SNPs having a larger effect size than the index SNP with the lowest P-value rs2290400 (bolded) appear here. Position (hg19) followed by the major allele A, minor allele B, P-value in meta-analysis, coded allele frequency in entire dataset, beta value, meta-analysis OR (odds ratio), 1000 genomes minor allele frequency in Africans, Amerindians, Asians, and Europeans, evidence of DNA hypersensitive site (from Haploreg), Regulome DB score, GWAS hits from other diseases, ENCODE-described motifs which interact at the site, RefSeq gene annotation at that location, and the Location within the gene.

\*Regulome DB Score

|    |                                                                             |
|----|-----------------------------------------------------------------------------|
| 1a | eQTL + TF binding + matched TF motif + matched DNase Footprint + DNase peak |
| 1b | eQTL + TF binding + any motif + DNase Footprint + DNase peak                |
| 1c | eQTL + TF binding + matched TF motif + DNase peak                           |
| 1d | eQTL + TF binding + any motif + DNase peak                                  |
| 1e | eQTL + TF binding + matched TF motif                                        |
| 1f | eQTL + TF binding / DNase peak                                              |
| 2a | TF binding + matched TF motif + matched DNase Footprint + DNase peak        |
| 2b | TF binding + any motif + DNase Footprint + DNase peak                       |
| 2c | TF binding + matched TF motif + DNase peak                                  |
| 3a | TF binding + any motif + DNase peak                                         |
| 3b | TF binding + matched TF motif                                               |
| 4  | TF binding + DNase peak                                                     |
| 5  | TF binding or DNase peak                                                    |
| 6  | other (minimal binding data)                                                |
| 7  | no data                                                                     |

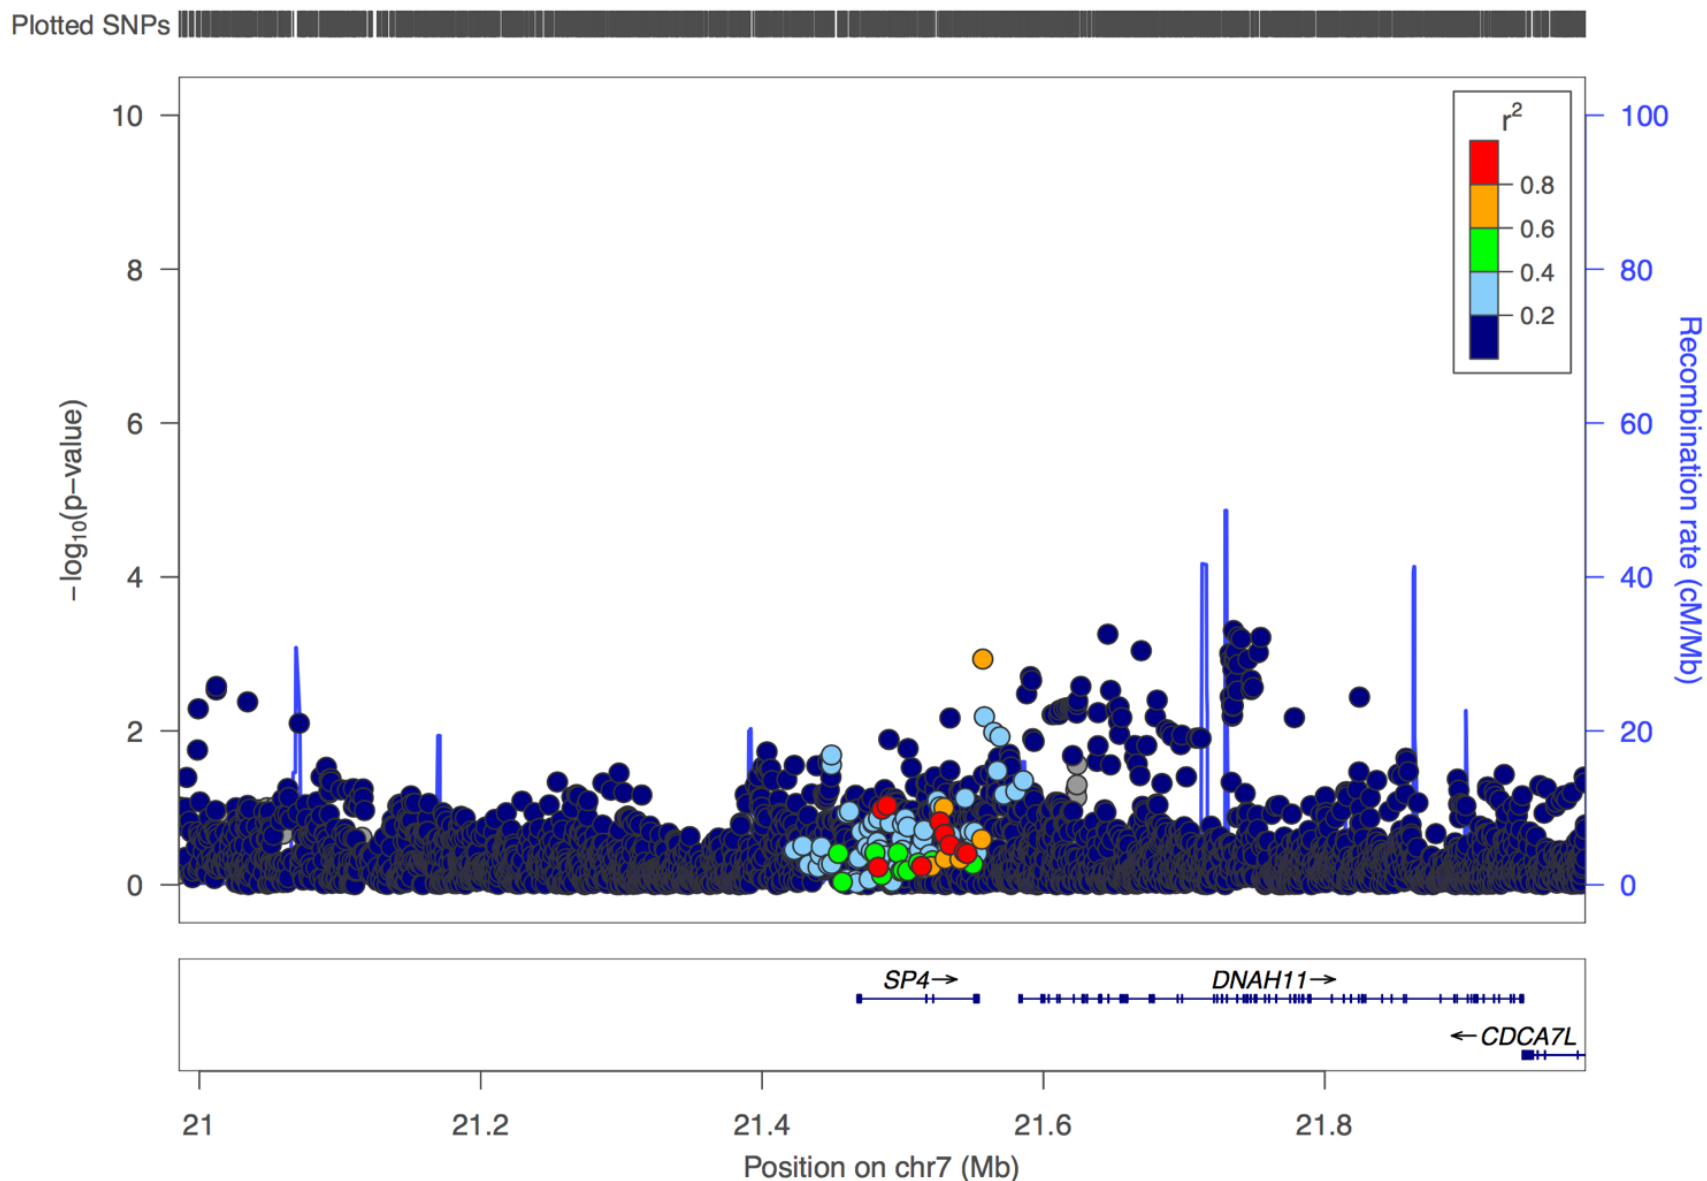

**Supplementary Figure 1:** Genetic association between case and control at the SP4 locus, conditioned on rs2390536. This represents the same region as displayed in Figure 2A of the main text.



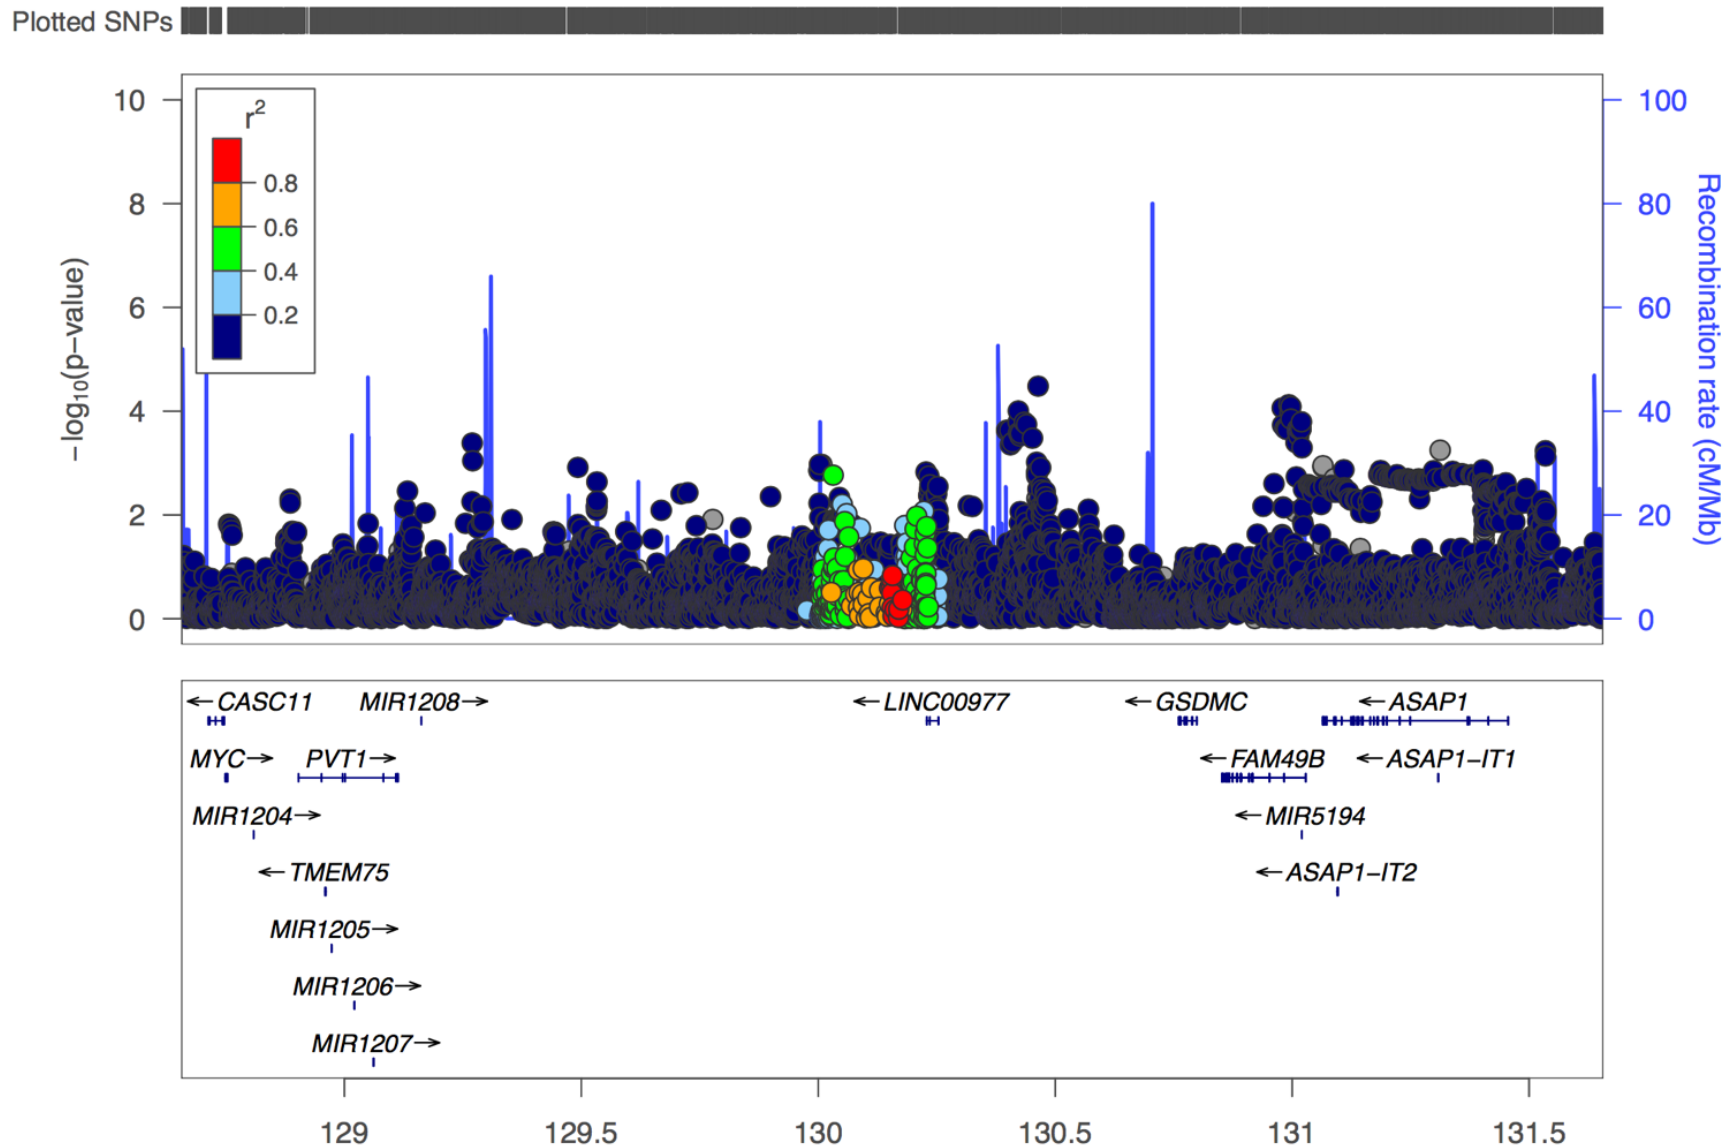

**Supplementary Figure 2:** Genetic association between case and control at the 8q24 locus, conditioned on rs4617118. This represents the same region as displayed in Figure 2B of the main text.

Plotted SNPs

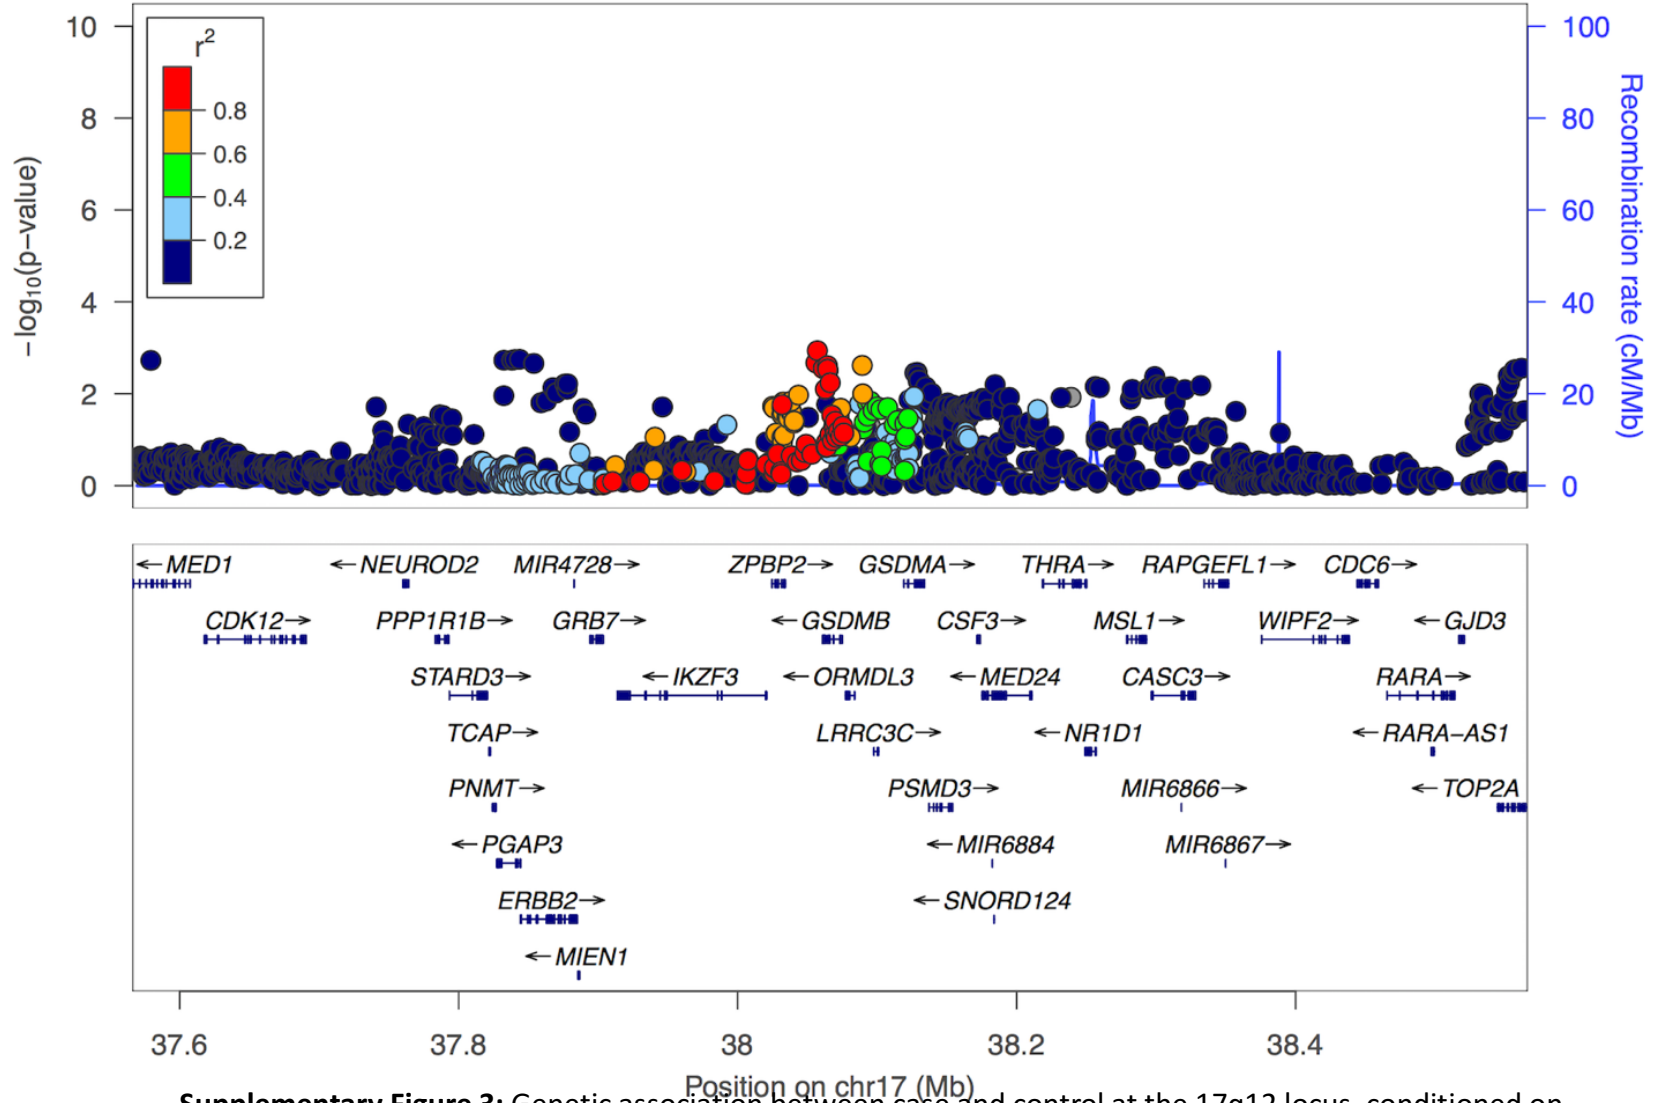

**Supplementary Figure 3:** Genetic association between case and control at the 17q12 locus, conditioned on rs2290400. This represents the same region as displayed in Figure 2C of the main text.
